# Supplementary material
Source: Research Square preprint supplement (doi:10.21203/rs.3.rs-8773157/v1)
Supplement: Supplementary file 1 [file 2f81585e25243e3e9585e1be.docx]

*Corresponding author:

Jia Fei, Department of Biochemistry and Molecular Biology, Medical College of Jinan University, 601 Western Huangpu Avenue, 510632 Guangzhou, China; Tel: 86-20-85220256; Fax: 86-20-85221343; Email: tfeijia@jnu.edu.cn.

Haiyan Hu

xuri1104@163.com

Shanghai Jiaotong University, Shanghai, China

Xiaojun Xia Ph.D

xiaxj@sysucc.org.cn

His research focuses on natural immunity and mRNA tumor vaccines.

Sun Yat-sen University Cancer Center/State Key Laboratory of Oncology in South China

Chang Li, email: [lichang78@163.com](mailto:lichang78@163.com,)

Letian Li letian823@163.com

Yunong Zhang yunozhang2-c@my.cityu.edu.hk

Rongjun Xu [1522952897@qq.com](mailto:1522952897@qq.com)

Wenjing Shi [3202826781@qq.com](mailto:3202826781@qq.com)

Wenjing Song 13919599170@163.com

**Author Information**

Rui Su:Department of Biochemistry and Molecular Biology, Medical College of Jinan University, Guangzhou 510632, China; Engineering Technology Research Center of Guangdong Province for Small Nucleic Acids Drug Development, Guangzhou 510632, China; Antisense Biopharmaceutical Technology Company, Limited, Guangzhou 510632, China. Email: [1747690245@qq.com](mailto:1359342210@qq.com)

Xiuyuan Wang:Department of Biochemistry and Molecular Biology, Medical College of Jinan University, Guangzhou 510632, China; Engineering Technology Research Center of Guangdong Province for Small Nucleic Acids Drug Development, Guangzhou 510632, China; Antisense Biopharmaceutical Technology Company, Limited, Guangzhou 510632, China. Email: [1660333923@qq.com](mailto:1359342210@qq.com)

Ziqi Wen : Department of Biochemistry and Molecular Biology, Medical College of Jinan University, Guangzhou 510632, China; Engineering Technology Research Center of Guangdong Province for Small Nucleic Acids Drug Development, Guangzhou 510632, China; Antisense Biopharmaceutical Technology Company, Limited, Guangzhou 510632, China. Email:2950391452@qq.com

Xingri Zhan: Department of Biochemistry and Molecular Biology, Medical College of Jinan University, Guangzhou 510632, China; Engineering Technology Research Center of Guangdong Province for Small Nucleic Acids Drug Development, Guangzhou 510632, China; Antisense Biopharmaceutical Technology Company, Limited, Guangzhou 510632, China. Email:786117317@qq.com

Yiling Long Department of Biochemistry and Molecular Biology, Medical College of Jinan University, Guangzhou 510632, China; Engineering Technology Research Center of Guangdong Province for Small Nucleic Acids Drug Development, Guangzhou 510632, China; Antisense Biopharmaceutical Technology Company, Limited, Guangzhou 510632, China. Email:1219819301@qq.com

Chuting Li:Department of Biochemistry and Molecular Biology, Medical College of Jinan University, Guangzhou 510632, China; Engineering Technology Research Center of Guangdong Province for Small Nucleic Acids Drug Development, Guangzhou 510632, China; Antisense Biopharmaceutical Technology Company, Limited, Guangzhou 510632, China. Email: [1359342210@qq.com](mailto:1359342210@qq.com)

Zhao Yin:Department of Biochemistry and Molecular Biology, Medical College of Jinan University, Guangzhou 510632, China; Engineering Technology Research Center of Guangdong Province for Small Nucleic Acids Drug Development, Guangzhou 510632, China; Antisense Biopharmaceutical Technology Company, Limited, Guangzhou 510632, China. Email: [zhaoyin@stu2014.jnu.edu.cn](mailto:zhaoyin@stu2014.jnu.edu.cn)

Yanjun Liu:Department of Biochemistry and Molecular Biology, Medical College of Jinan University, Guangzhou 510632, China; Engineering Technology Research Center of Guangdong Province for Small Nucleic Acids Drug Development, Guangzhou 510632, China; Antisense Biopharmaceutical Technology Company, Limited, Guangzhou 510632, China. Email:13697132607@163.com

Juhua Yang:Department of Biochemistry and Molecular Biology, Medical College of Jinan University, Guangzhou 510632, China; Engineering Technology Research Center of Guangdong Province for Small Nucleic Acids Drug Development, Guangzhou 510632, China; Antisense Biopharmaceutical Technology Company, Limited, Guangzhou 510632, China. Email:1755387566@qq.com

Jia Fei1-3:Department of Biochemistry and Molecular Biology, Medical College of Jinan University, Guangzhou 510632, China; Engineering Technology Research Center of Guangdong Province for Small Nucleic Acids Drug Development, Guangzhou 510632, China; Antisense Biopharmaceutical Technology Company, Limited, Guangzhou 510632, China. Email: [tfeijia@jnu.edu.cn](mailto:tfeijia@jnu.edu.cn) or [efeijia@163.com](mailto:efeijia@163.com)

***Corresponding author:** Jia Fei, email: [tfeijia@jnu.edu.cn](mailto:tfeijia@jnu.edu.cn) or [efeijia@163.com](mailto:efeijia@163.com), Department of Biochemistry and Molecular Biology, Medical College of Jinan University, Guangzhou 510632, China. Tel:86-20-85220256.
